# Supplementary material for: NaGaI3O9F: a new alkali metal gallium iodate combined with IO3− and IO3F2− units
Source: Royal Society of Chemistry journal article supplement (doi:10.1039/d1dt02122b), 2021-01-01
Supplement: d1dt02122b1.pdf [file d1dt02122b1.pdf]

## Supporting Information

### **NaGaI<sub>3</sub>O<sub>9</sub>F: A new alkali metal gallium iodate combined with IO<sub>3</sub><sup>-</sup> and IO<sub>3</sub>F<sup>2-</sup> units**

Dandan Wang,<sup>a</sup> Pifu Gong,<sup>b</sup> Xinyuan Zhang,<sup>\*a</sup> Zheshuai Lin,<sup>b</sup> Zhanggui Hu <sup>\*a</sup> and Yicheng Wu<sup>a</sup>

<sup>a</sup> Tianjin Key Laboratory of Functional Crystal Materials, Institute of Functional Crystals, Tianjin University of Technology, Tianjin 300384, China.

<sup>b</sup> Key Laboratory of Functional Crystals and Laser Technology, Beijing Center for Crystal Research and Development, Technical Institute of Physics and Chemistry, Chinese Academy of Sciences, Beijing 100190, China.

## Contents.

**Table S1.** Fractional atomic coordinates ( $\times 10^4$ ) and equivalent isotropic displacement parameters ( $\text{\AA}^2 \times 10^3$ ) of  $\text{NaGaI}_3\text{O}_9\text{F}$ .

**Table S2.** Selected bond lengths ( $\text{\AA}$ ) of  $\text{NaGaI}_3\text{O}_9\text{F}$ .

**Table S3.** Selected bond angles ( $^\circ$ ) of  $\text{NaGaI}_3\text{O}_9\text{F}$ .

**Figure S1.** The EDS spectrum of  $\text{NaGaI}_3\text{O}_9\text{F}$ .

**Figure S2.** The coordination environment of Na atom.

**Figure S3.** The TG and DTA curves (a) and PXRD patterns for the residual (b) of  $\text{NaGaI}_3\text{O}_9\text{F}$ .

**Figure S4.** The IR spectrum of  $\text{NaGaI}_3\text{O}_9\text{F}$ .

**Figure S5.** The Raman spectrum of  $\text{NaGaI}_3\text{O}_9\text{F}$ .

**Figure S6.** Birefringence measurement of  $\text{NaGaI}_3\text{O}_9\text{F}$ ; (a) the original crystal; (b) the crystal in the extinction state; (c) the crystal interference color observed under the microscope and (d) the photographs of crystal thickness.

## 1. Supplementary Tables.

**Table S1.** Fractional atomic coordinates ( $\times 10^4$ ) and equivalent isotropic displacement parameters ( $\text{\AA}^2 \times 10^3$ ) of  $\text{NaGaI}_3\text{O}_9\text{F}$ .

| Atom | x          | y          | z         | $U_{\text{(eq)}}^a$ |
|------|------------|------------|-----------|---------------------|
| I1   | 939.7(4)   | 5743.3(11) | 7078.1(4) | 11.91(13)           |
| I2   | 1575.5(4)  | -21.2(11)  | 4921.7(4) | 10.95(12)           |
| I3   | 4898.2(16) | 785(5)     | 6240.8(8) | 11.4(3)             |
| I4   | 5138(16)   | 80(50)     | 6331(11)  | 11.4(3)             |
| Na1  | 6981(3)    | 4953(7)    | 6124(3)   | 24.1(8)             |
| Ga1  | 3092.6(7)  | 5046.2(19) | 6619.8(7) | 10.7(2)             |
| F1   | 3590(4)    | 2702(10)   | 7825(4)   | 21.8(12)            |
| O1   | 2220(4)    | 7007(11)   | 7224(5)   | 16.3(14)            |
| O2   | 192(5)     | 7571(13)   | 5877(5)   | 26.4(16)            |
| O3   | 793(5)     | 7987(12)   | 8058(5)   | 20.9(15)            |
| O4   | 1924(5)    | 1651(12)   | 3951(5)   | 18.5(14)            |
| O5   | 2717(4)    | -2246(11)  | 5446(5)   | 13.7(13)            |
| O6   | 1889(4)    | 2646(12)   | 5938(5)   | 15.3(13)            |
| O7   | 3864(4)    | 3339(12)   | 5863(5)   | 16.0(13)            |
| O8   | 5714(4)    | 2294(11)   | 7539(4)   | 12.9(13)            |
| O9   | 5607(5)    | 2137(13)   | 5506(5)   | 19.9(14)            |

$^a U_{\text{(eq)}}$  is defined as one-third of the trace of the orthogonalized  $U_{ij}$  tensor.

**Table S2.** Selected bond lengths (Å) of NaGaI<sub>3</sub>O<sub>9</sub>F.

| Bond   | Length/Å  |
|--------|-----------|
| I1-O1  | 1.847(5)  |
| I1-O2  | 1.804(6)  |
| I1-O3  | 1.806(6)  |
| I2-O4  | 1.783(6)  |
| I2-O5  | 1.845(5)  |
| I2-O6  | 1.832(6)  |
| I3-O7  | 1.840(6)  |
| I3-O8  | 1.849(6)  |
| I3-O9  | 1.797(6)  |
| I4-O7  | 2.31(3)   |
| I4-O8  | 1.875(14) |
| I4-O9  | 1.820(14) |
| I4-F1  | 2.07(3)   |
| Ga1-O1 | 1.979(6)  |
| Ga1-O5 | 1.987(6)  |
| Ga1-O6 | 1.977(6)  |
| Ga1-O7 | 1.958(6)  |
| Ga1-O8 | 1.966(6)  |
| Ga1-F1 | 1.902(5)  |

**Table S3.** Selected bond angles (°) of NaGaI<sub>3</sub>O<sub>9</sub>F.

| Angle    | (°)       |
|----------|-----------|
| O1-I1-O3 | 96.0(3)   |
| O2-I1-O1 | 97.6(3)   |
| O2-I1-O3 | 99.9(3)   |
| O4-I2-O6 | 100.2(3)  |
| O4-I2-O5 | 96.2(3)   |
| O6-I2-O5 | 102.4(3)  |
| O8-I3-O9 | 96.3(3)   |
| O7-I3-O8 | 97.1(3)   |
| O9-I3-O7 | 98.4(3)   |
| F1-I4-O7 | 163.4(7)  |
| F1-I4-O9 | 102.1(10) |
| O8-I4-F1 | 81.6(8)   |
| O7-I4-O8 | 82.1(9)   |
| O9-I4-O8 | 94.6(7)   |
| O7-I4-O9 | 82.8(10)  |

## 2. Supplementary Figures.

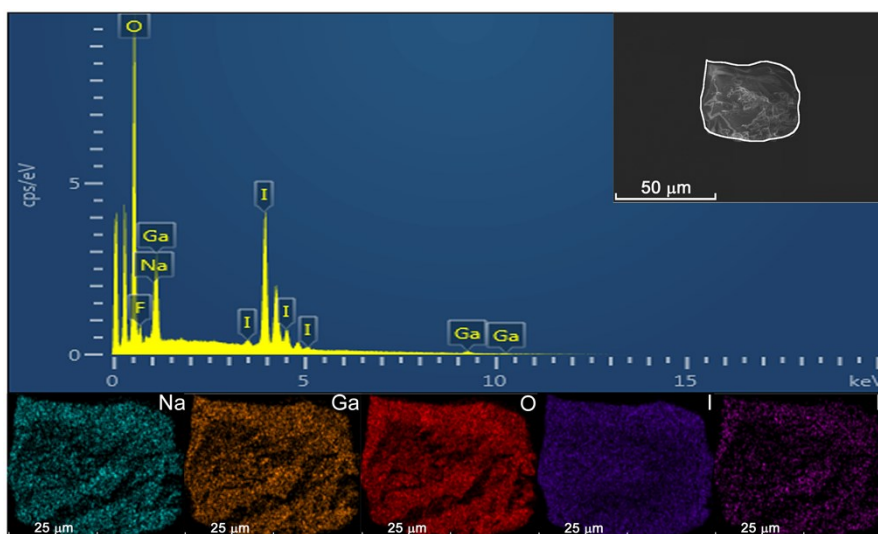

**Figure S1.** The EDS spectrum of NaGaI<sub>3</sub>O<sub>9</sub>F.

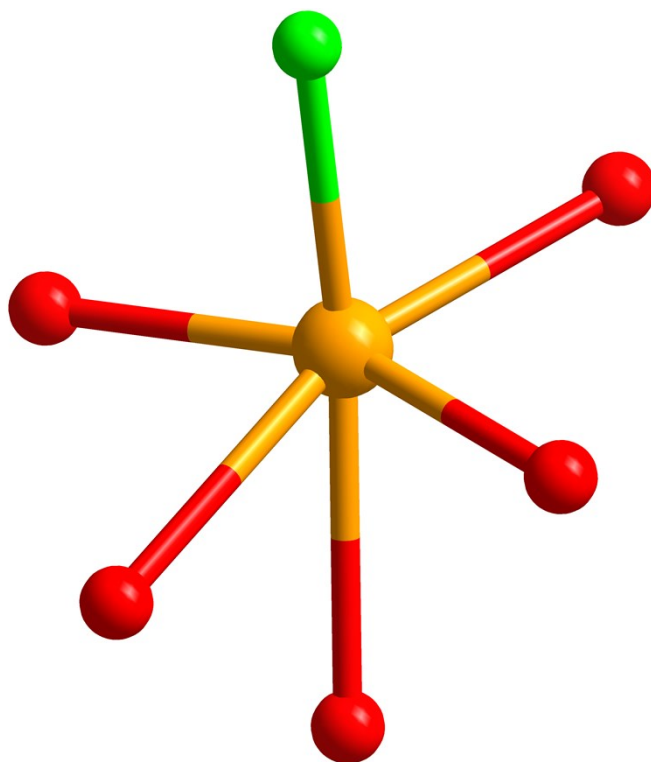

**Figure S2.** The coordination environment of Na atom.

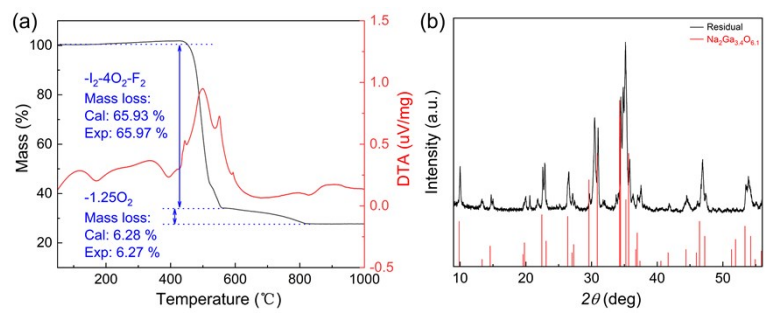

**Figure S3.** The TG and DTA curves (a) and PXRD patterns for the residual (b) of NaGa<sub>3</sub>O<sub>9</sub>F.



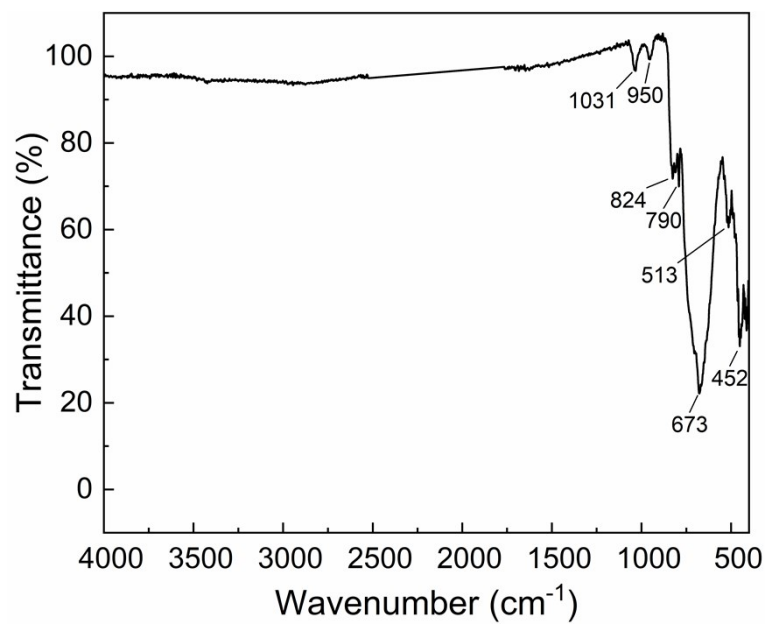

**Figure S4.** The IR spectrum of NaGaI<sub>3</sub>O<sub>9</sub>F.

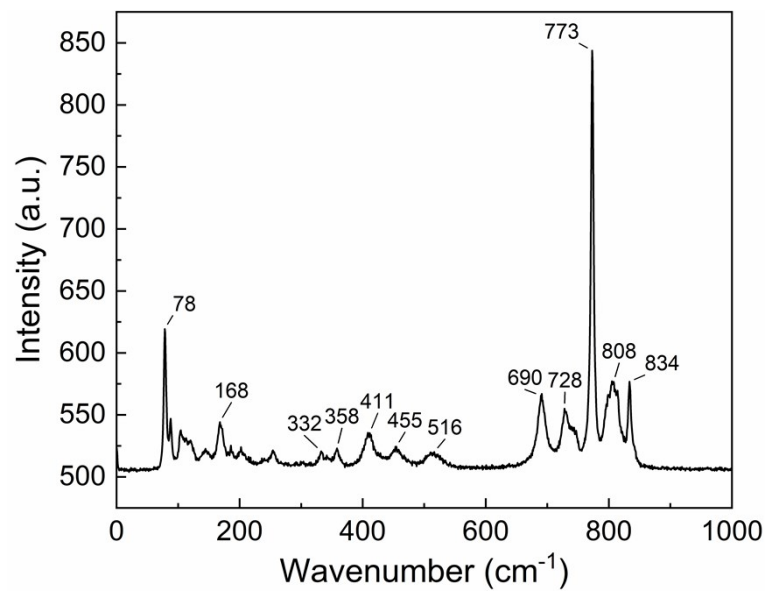

**Figure S5.** The Raman spectrum of NaGa<sub>3</sub>O<sub>9</sub>F.

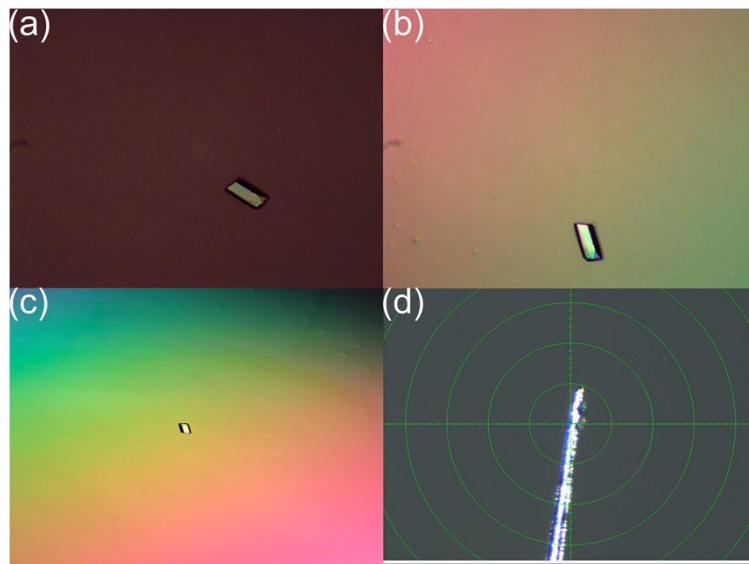

**Figure S6.** Birefringence measurement of  $\text{NaGaI}_3\text{O}_9\text{F}$ ; (a) the original crystal; (b) the crystal in the extinction state; (c) the crystal interference color observed under the microscope and (d) the photographs of crystal thickness.
